# Supplementary material for: Preparation of layered titanate with interlayer cadmium sulfide particles for visible-light-assisted dye degradation
Source: Royal Society of Chemistry journal article supplement (doi:10.1039/c4ra09692d), 2014-11-10
Supplement: c4ra09692d1.pdf [file c4ra09692d1.pdf]

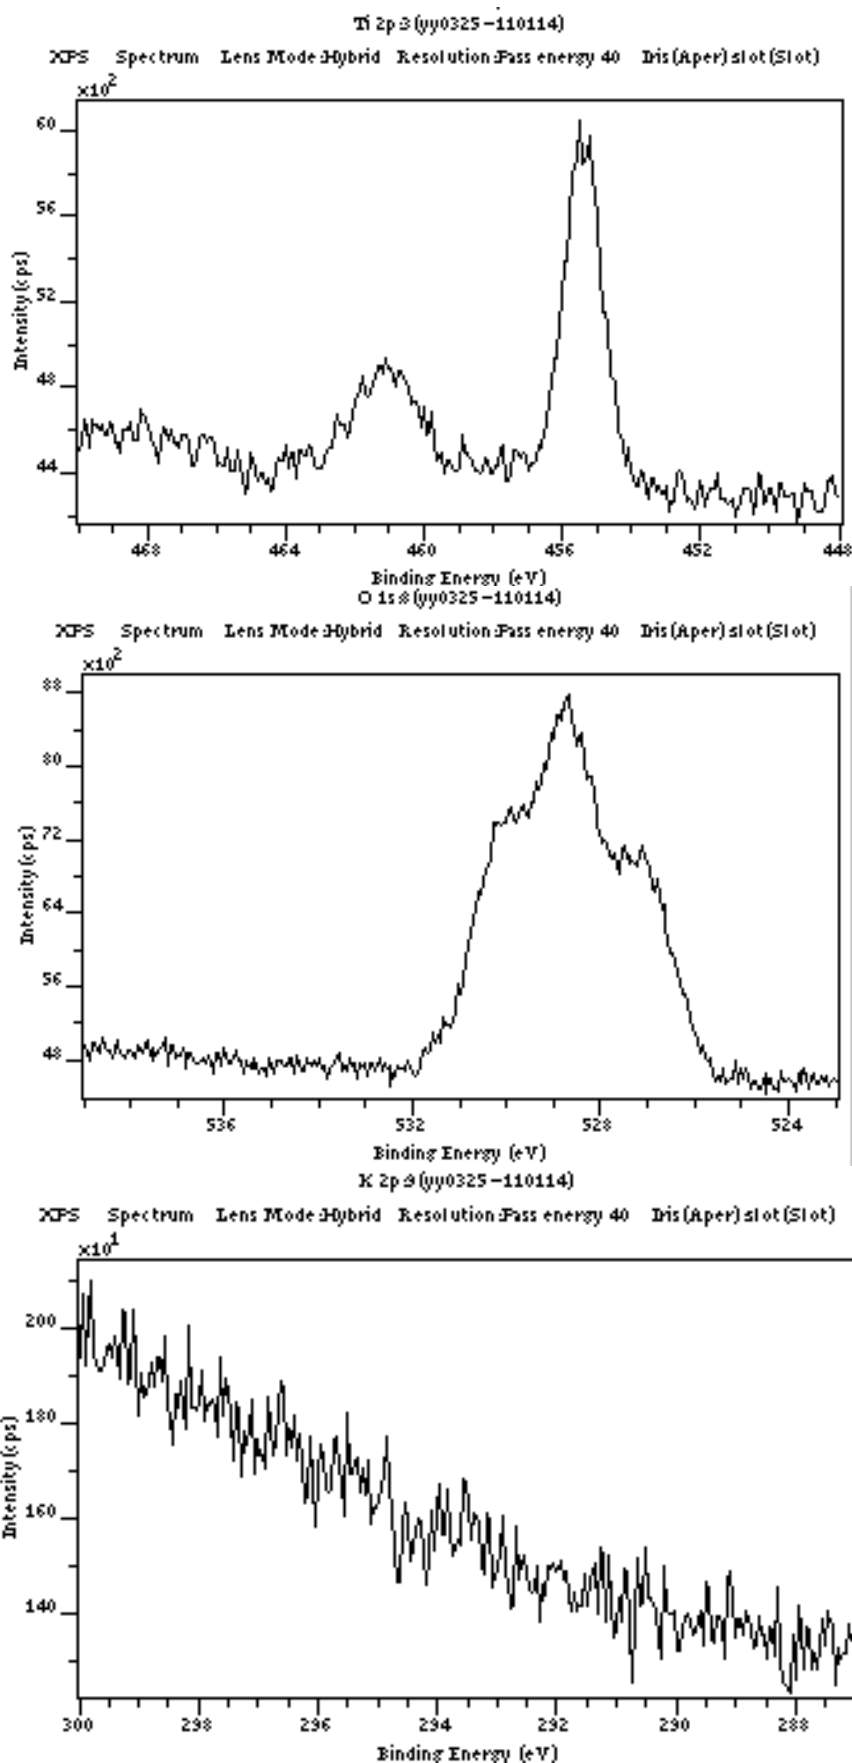

Fig. S2 XPS spectra of Ti, O and K in sample  $K_2Ti_4O_9$ -CdS-1.

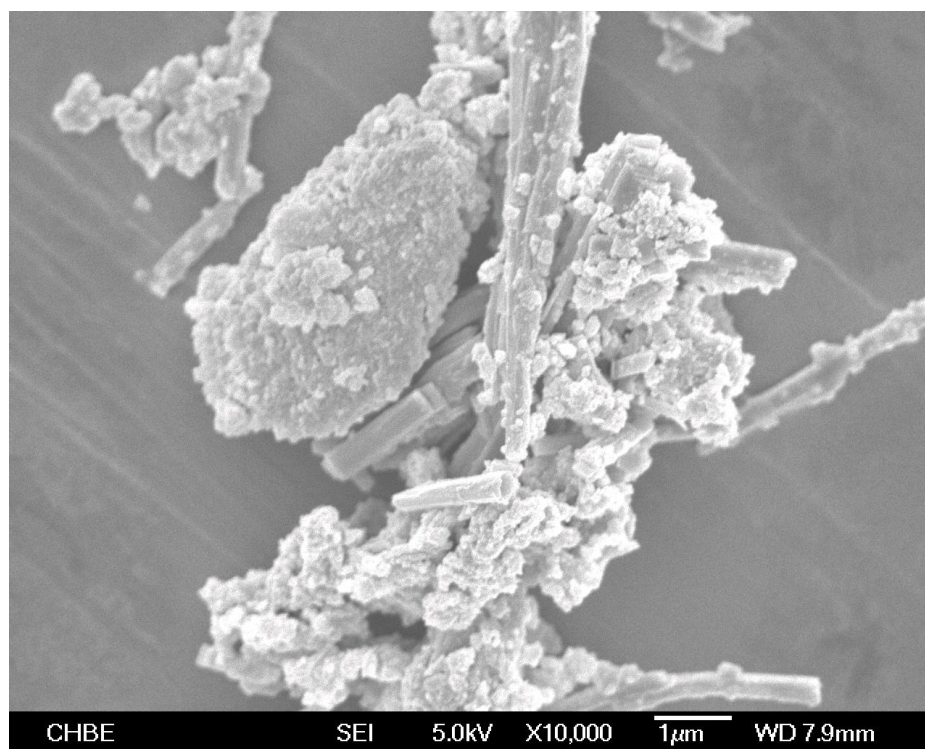

Fig. S3 FESEM image of sample  $(K_2Ti_4O_9-CdS)_{mix}$ .

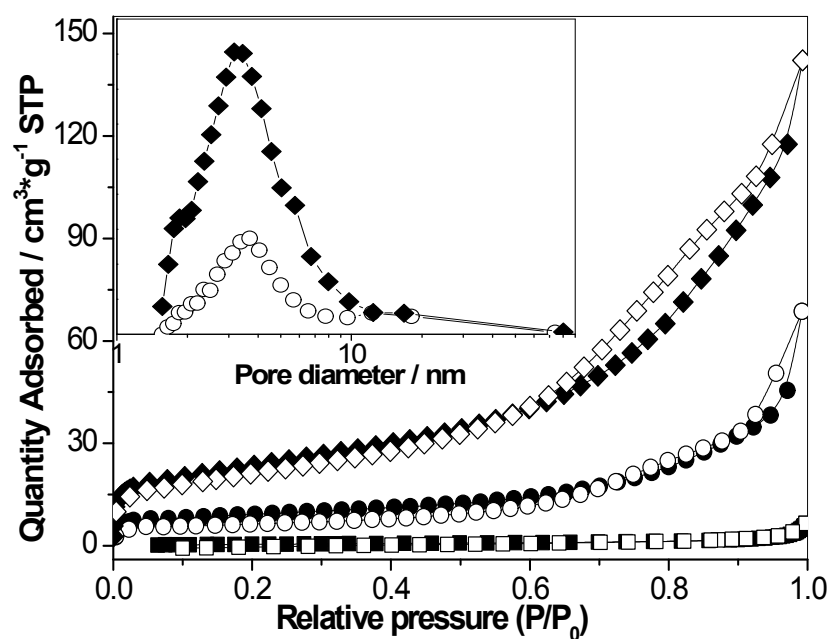

Fig. S4  $N_2$  adsorption (solid)-desorption (hollow) isotherms of  $K_2Ti_4O_9$  (square),  $K_2Ti_4O_9-CdS19\%$  (circle) and  $K_2Ti_4O_9-CdS47\%$  (diamond), and the pore size distributions (inset) of  $K_2Ti_4O_9-CdS19\%$  (circle) and  $K_2Ti_4O_9-CdS47\%$  (diamond).

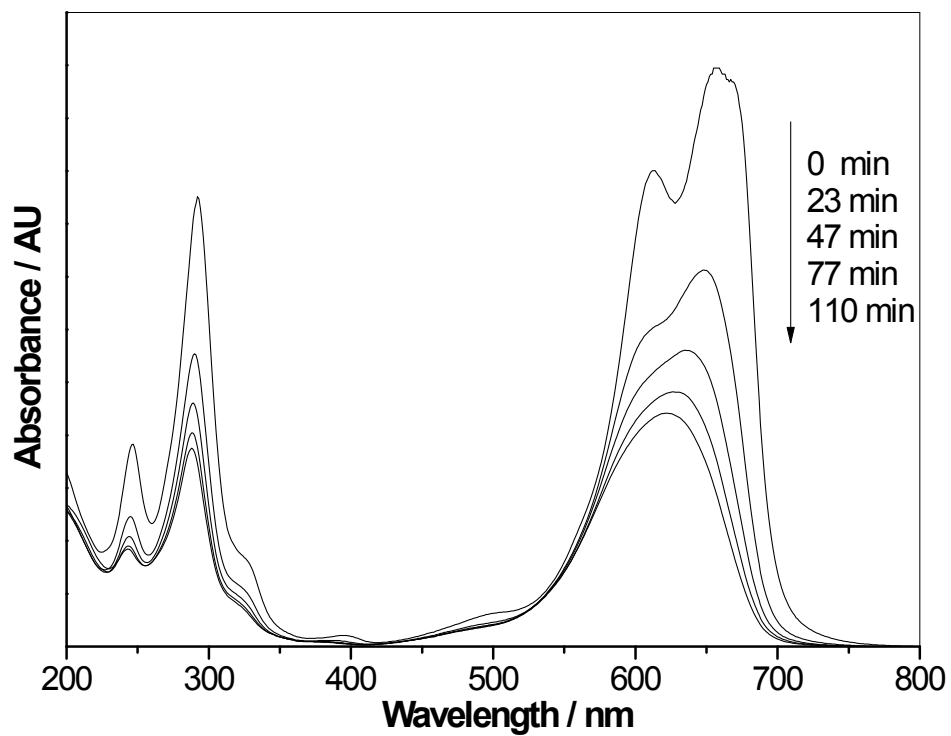

Fig. S5 Absorption spectra of MB with irradiation time over  $K_2Ti_4O_9$ -CdS47%.

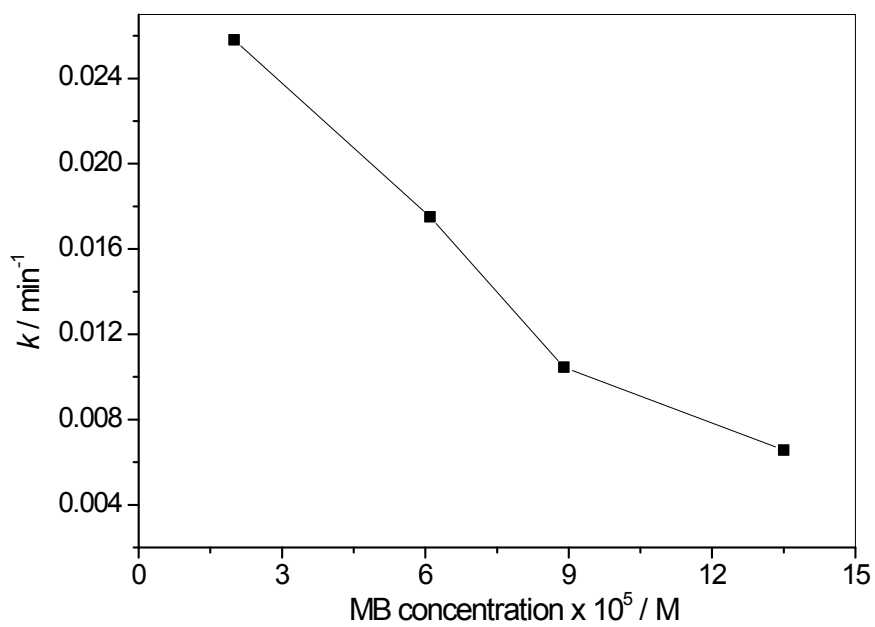

Fig. S6 Effect of initial MB concentration on the rate constant over  $K_2Ti_4O_9$ -CdS47%.

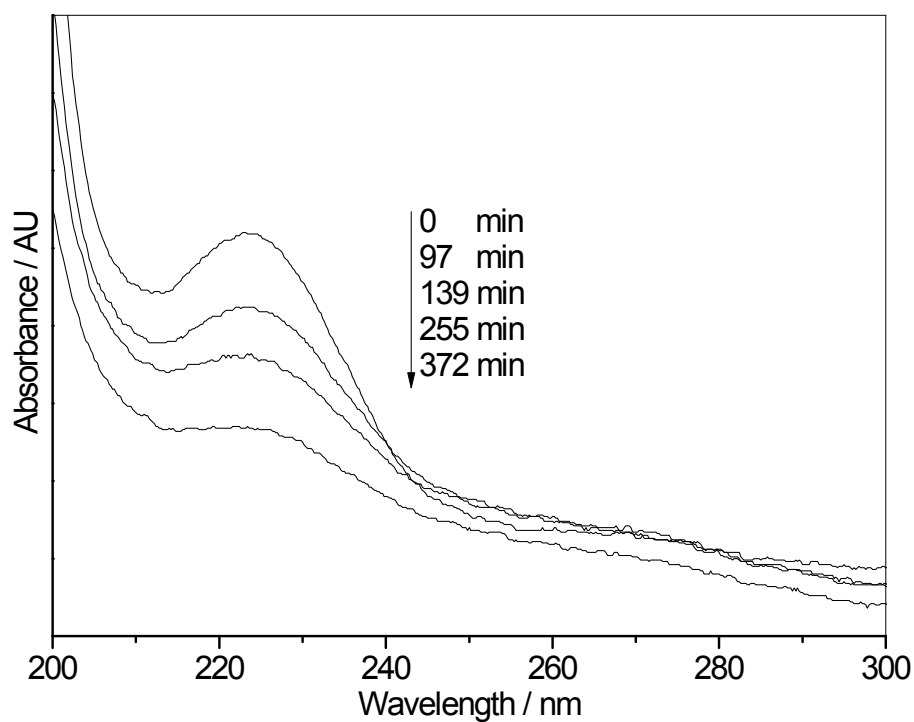

**Fig. S7** Absorption spectra of benzoic acid with irradiation time over  $K_2Ti_4O_9-CdS47\%$ .

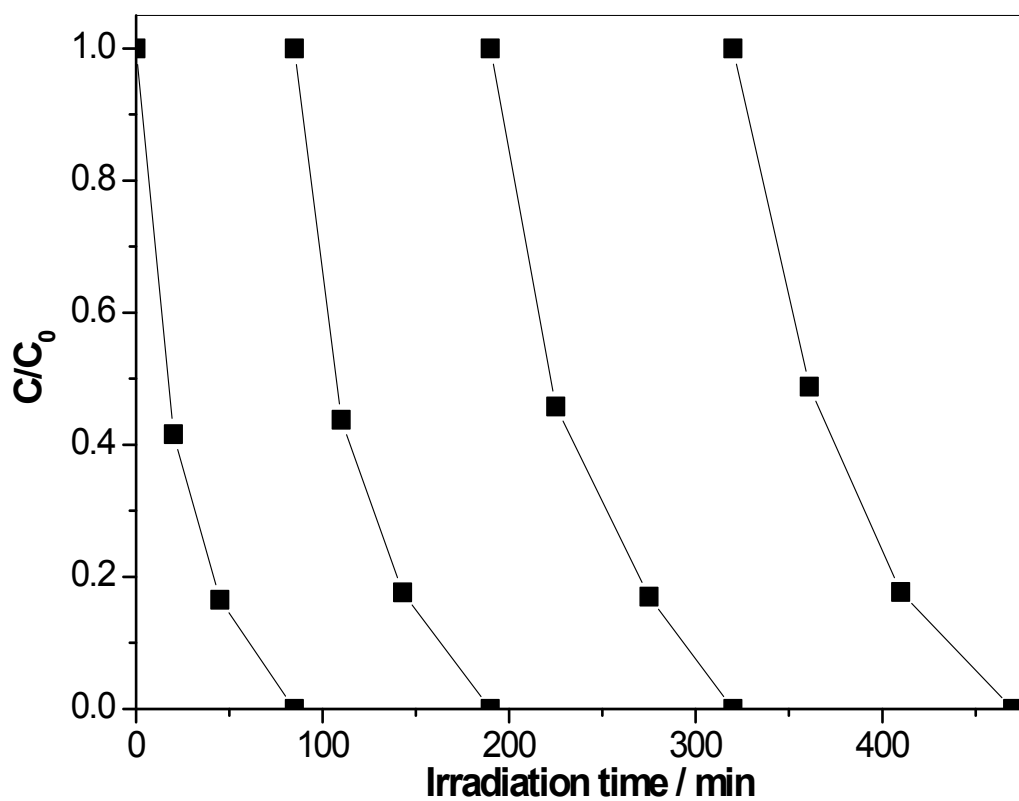

**Fig. S8** Repeated photocatalytic degradation of MB over composite  $K_2Ti_4O_9-CdS47\%$ .  $[MB] = 2.0 \times 10^{-5} M$ .

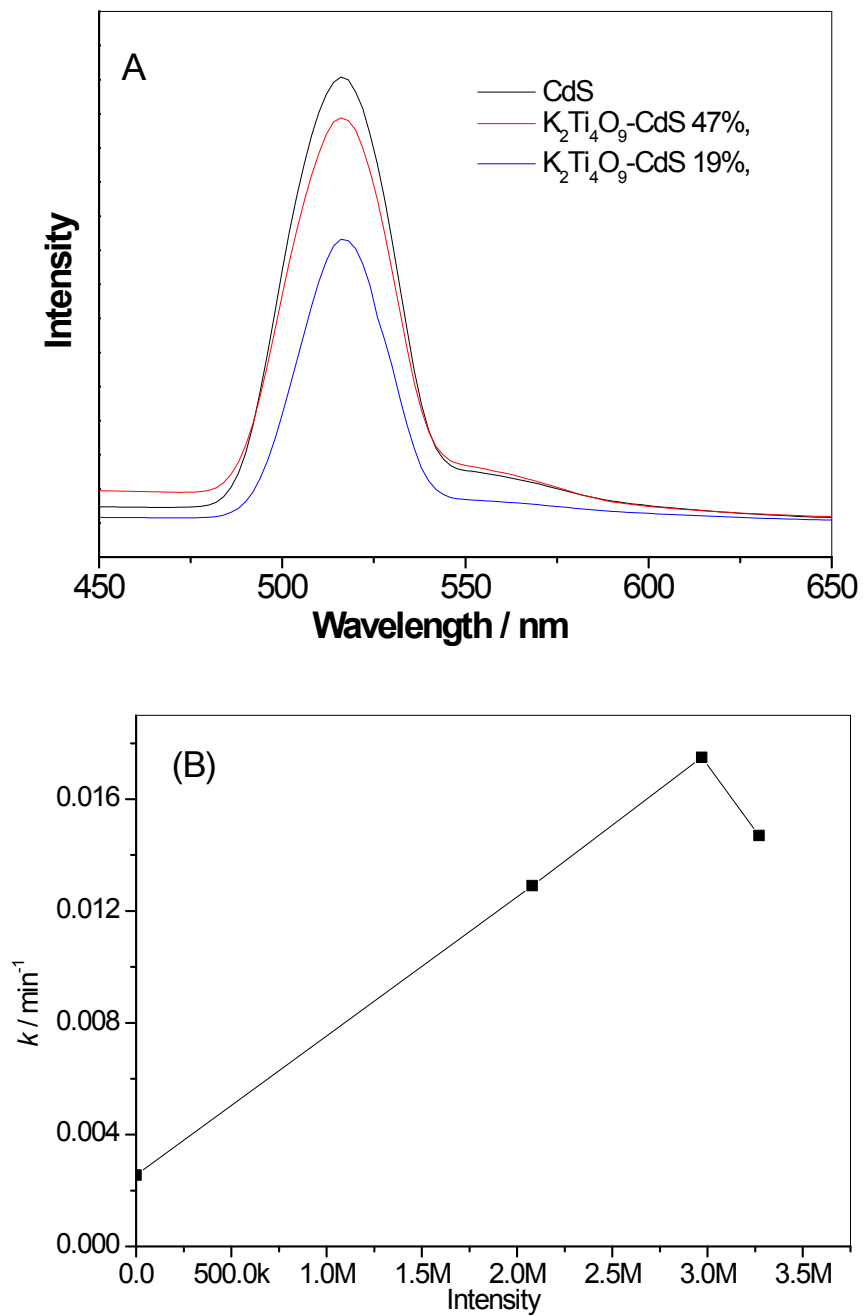

**Fig. S9** (A) Photoluminescence spectra of CdS and composite  $K_2Ti_4O_9$ -CdS with the excitation wavelength of 400 nm, (B) the correlation between rate constant and the photoluminescent intensity.

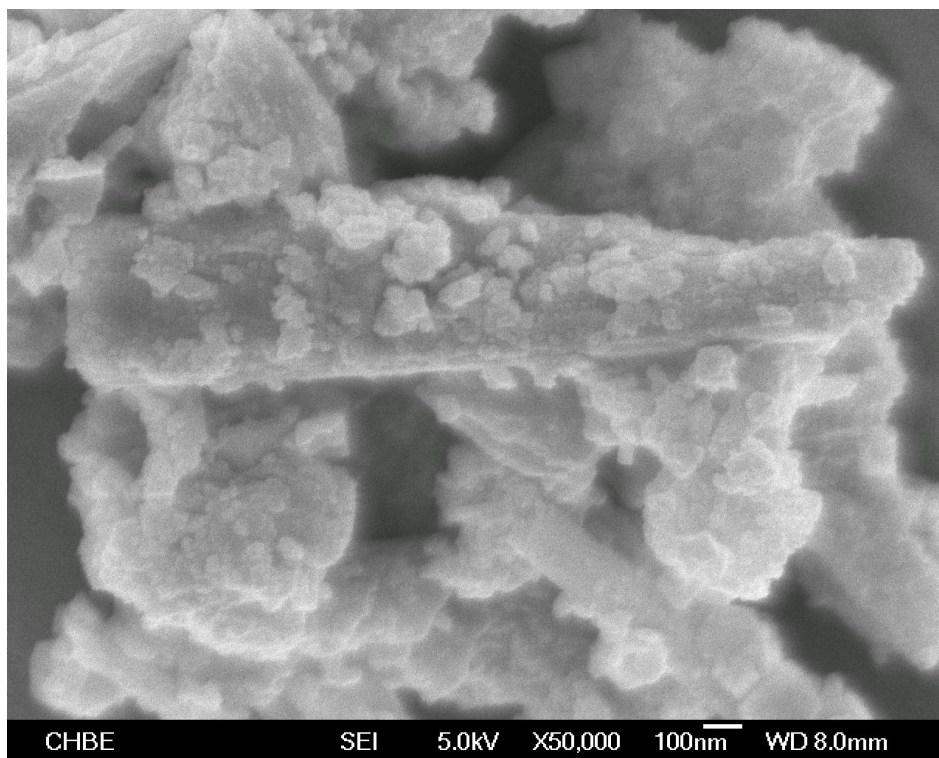

**Fig. S10** FESEM image of sample K<sub>2</sub>Ti<sub>4</sub>O<sub>9</sub>-CdS47%.
